# Supplementary material for: Characteristics of Youth With Combined Histories of Violent Behavior, Suicidal Ideation or Behavior, and Gun-Carrying
Source: Atypon-hosted journal article supplement (doi:10.1027/0227-5910/a000389), 2016-06-01
Supplement: 0227-5910_a000389_esm2.pdf [file 0227-5910_a000389_esm2.pdf]

ESM 2. Survey Items for Known Risk and Protective Factors

| Factors                                    | Survey Items                                                                                                                                                                                                                                                                                                                                                                                                                                                                 | Response Options                                                                                                                                                         | Variable Definitions                                                                                                                                                                                                                                                                                                                                                                                                                                                                                                                                                                                                                                                                                                                                                                                                                                                                                                                                                                                                     |
|--------------------------------------------|------------------------------------------------------------------------------------------------------------------------------------------------------------------------------------------------------------------------------------------------------------------------------------------------------------------------------------------------------------------------------------------------------------------------------------------------------------------------------|--------------------------------------------------------------------------------------------------------------------------------------------------------------------------|--------------------------------------------------------------------------------------------------------------------------------------------------------------------------------------------------------------------------------------------------------------------------------------------------------------------------------------------------------------------------------------------------------------------------------------------------------------------------------------------------------------------------------------------------------------------------------------------------------------------------------------------------------------------------------------------------------------------------------------------------------------------------------------------------------------------------------------------------------------------------------------------------------------------------------------------------------------------------------------------------------------------------|
| <u>Risk Factors</u>                        |                                                                                                                                                                                                                                                                                                                                                                                                                                                                              |                                                                                                                                                                          |                                                                                                                                                                                                                                                                                                                                                                                                                                                                                                                                                                                                                                                                                                                                                                                                                                                                                                                                                                                                                          |
| Friends who engage in delinquent behaviors | <p>In the past 12 months, how many of your friends have:</p> <ul style="list-style-type: none"> <li>a. Skipped school?</li> <li>b. Stole things?</li> <li>c. Hit someone with the idea of really hurting that person?</li> <li>d. Drank alcohol?</li> <li>e. Sold marijuana or other drugs?</li> <li>f. Fought as part of a group against another group?</li> <li>g. Used a weapon to threaten or injure someone?</li> <li>h. Hit/slapped a boyfriend/girlfriend?</li> </ul> | <p>1=None of them<br/>                 2=Very few of them<br/>                 3=Some of them<br/>                 4=Most of them<br/>                 5=All of them</p> | <p><u>Any exposure</u>- if the response was “some of them” or more for any of the eight items.</p> <p><u>Level of scores</u>- Youth were categorized into “low,” “moderate,” and “high” score levels based on their average score across all answered survey items. Most (96.3%) of the respondents answered at least 6 items; 2.5% answered 1-5 items; 1.2% answered 0 items and were listed as having “unknown” values. We divided the population roughly into equal thirds and assigned those to a “low” level if they had an average score of <math>\leq 1.25</math> (i.e., the score at the 33%ile threshold), a “high” level if they had an average score <math>&gt; 1.72</math> (i.e., the score at the 66%ile), and a “moderate” level if they had a score in between.</p> <p><u>Variable characteristics</u>-The eight survey items included for this factor were originally adapted from the “Fast Track” project (Conduct Problems Prevention Research Group, 1998) and have a Cronbach’s alpha of 0.845.</p> |
| Peer-violence victimization                | <p>In the past 12 months, how often has someone about your age and of the same sex done the following things to you? (Only include it when the person did it to you first.)</p> <ul style="list-style-type: none"> <li>a. Damaged something that belonged to me.</li> <li>b. Said things to hurt my feelings on purpose.</li> <li>c. Threatened to hit or throw something at me.</li> <li>d. Insulted me in front of others.</li> <li>e. Scratched me.</li> </ul>            | <p>1=Never<br/>                 2=1-3 times<br/>                 3=4-9 times<br/>                 4=10 times or more</p>                                                 | <p><u>Any exposure</u> - if the response was “1-3 times” or more for any of the 15 survey items.</p> <p><u>Level of scores</u>- Youth were categorized into “low,” “moderate,” and “high” score levels based on their average scores across all answered survey items in a manner similar to how “friendships with delinquents” was coded. Most (94.1%) of the respondents answered at least 10 items; 1.7% answered 1-9 items; and 4.2% answered 0 items and were listed as having “unknown” values. Youth were in the “low” level if they had an average score of <math>\leq 1.02</math> (i.e., threshold at the 33%ile), a “high” level if they had an average score <math>&gt; 1.22</math> (i.e., threshold of 66%ile), and a “moderate” level if they had a score in between.</p>                                                                                                                                                                                                                                   |

|                     |                                                                                                                                                                                                                                                                                                                                                                                                                                                                                                                                                                                          |                                                                      |                                                                                                                                                                                                                                                                                                                                                                                                                                                                                                                                                                                                                                                                                                                                                                                                                                                                                                                                                                     |
|---------------------|------------------------------------------------------------------------------------------------------------------------------------------------------------------------------------------------------------------------------------------------------------------------------------------------------------------------------------------------------------------------------------------------------------------------------------------------------------------------------------------------------------------------------------------------------------------------------------------|----------------------------------------------------------------------|---------------------------------------------------------------------------------------------------------------------------------------------------------------------------------------------------------------------------------------------------------------------------------------------------------------------------------------------------------------------------------------------------------------------------------------------------------------------------------------------------------------------------------------------------------------------------------------------------------------------------------------------------------------------------------------------------------------------------------------------------------------------------------------------------------------------------------------------------------------------------------------------------------------------------------------------------------------------|
|                     | <ul style="list-style-type: none"> <li>f. Put down my looks.</li> <li>g. Hit or slapped me.</li> <li>h. Slammed me or held me against a wall.</li> <li>i. Kicked me.</li> <li>j. Pushed, grabbed, or shoved me.</li> <li>k. Forced me to have sex or to do something sexual that I did not want to do.</li> <li>l. Threw something at me that could hurt.</li> <li>m. Punched or hit me with something that could hurt.</li> <li>n. Threatened or injured me with a knife or gun.</li> <li>o. Hurt me badly enough to where I needed bandages or care from a doctor or nurse.</li> </ul> |                                                                      | <p><u>Variable characteristics</u>-The fifteen survey items included for this factor were originally adapted from Safe Dates Project (Foshee et al., 1996) and have a Cronbach's alpha of 0.932.</p>                                                                                                                                                                                                                                                                                                                                                                                                                                                                                                                                                                                                                                                                                                                                                                |
| Depressive symptoms | <p>During the past 30 days, how often:</p> <ul style="list-style-type: none"> <li>a. Were you sad?</li> <li>b. Were you grouchy or irritable or in a bad mood?</li> <li>c. Did you feel hopeless about the future?</li> <li>d. Did you feel like not eating or eating more than usual?</li> <li>e. Did you sleep a lot more or a lot less than usual?</li> <li>f. Did you have difficulty concentrating on your schoolwork?</li> </ul>                                                                                                                                                   | <p>1=Never<br/>2=Rarely<br/>3=Sometimes<br/>4=Often<br/>5=Always</p> | <p><u>Any exposure</u>-if the respondent had an average score of 3 or higher across the six survey items.</p> <p><u>Level of scores</u>- Youth were categorized into "low," "moderate," and "high" score levels based on their average scores across all answered survey items in a manner similar to how "friendships with delinquents" was coded. Most (94.5%) of the respondents answered at least 5 items; 2.4% answered 1-4 items; 3.1% answered 0 items and were listed as having "unknown" values. Youth were in the "low" level if they had an average score of <math>\leq 2.1</math> (i.e., threshold at the 33%ile), a "high" level if they had an average score <math>&gt; 3.1</math> (i.e., threshold at the 66%ile), and a "moderate" level if they had a score in between.</p> <p><u>Variable characteristics</u>-The six survey items included for this factor were originally adapted from Orpinas (1993) and have a Cronbach's alpha of 0.847.</p> |

|                                  |                                                                                                                                                                                                                                                                                                                                                   |                                                                                                                                                                                                                   |                                                                                                                                                                                                                                                                                                                                                                                                                                                                                                                                                                                                                                                                                                                                                                                                                                                                                                                                                                                                                                                                                                                                                                                                                                                                                                               |
|----------------------------------|---------------------------------------------------------------------------------------------------------------------------------------------------------------------------------------------------------------------------------------------------------------------------------------------------------------------------------------------------|-------------------------------------------------------------------------------------------------------------------------------------------------------------------------------------------------------------------|---------------------------------------------------------------------------------------------------------------------------------------------------------------------------------------------------------------------------------------------------------------------------------------------------------------------------------------------------------------------------------------------------------------------------------------------------------------------------------------------------------------------------------------------------------------------------------------------------------------------------------------------------------------------------------------------------------------------------------------------------------------------------------------------------------------------------------------------------------------------------------------------------------------------------------------------------------------------------------------------------------------------------------------------------------------------------------------------------------------------------------------------------------------------------------------------------------------------------------------------------------------------------------------------------------------|
| <p>Illicit substance use</p>     | <p>During the past 12 months, on how many days did you have at least one drink of alcohol?</p> <p>During the past 12 months, on how many days did you drink five or more drinks in a row?</p> <p>During the past 12 months, on how many days did you use inhalants (glue or solvents) or illegal drugs such as marijuana, cocaine, or heroin?</p> | <p>1=Every day or almost every day<br/> 2=3-5 days a week<br/> 3=1-2 days a week<br/> 4=2-3 days a month<br/> 5=Once a month or less (3-12 times per year)<br/> 6=1-2 days in the past 12 months<br/> 7=Never</p> | <p><u>Any exposure</u>-if the respondent answered “1-2 days in the past 12 months” or more often for any of the three survey items.</p> <p><u>Level of scores</u>- Youth were categorized into “low,” “moderate,” and “high” score levels based on their average scores across all answered survey items in a manner similar to how “friendships with delinquents” was coded. Most (99.2%) of the respondents answered at least 2 items; 0.5% answered 1 item; 0.3% answered 0 items and were listed as having “unknown” values. Youth were in the “low” level if they had an average score of <math>\geq 6.9</math> (i.e., threshold at the 33%ile), a “high” level if they had an average score <math>&lt; 6.1</math> (i.e., threshold at the 66%ile), and a “moderate” level if they had a score in between.</p> <p><u>Variable characteristics</u>-The three survey items included for this factor were originally adapted from the Youth Risk Behavior Survey (details at <a href="http://www.cdc.gov/HealthyYouth/yrbs/index.htm">http://www.cdc.gov/HealthyYouth/yrbs/index.htm</a>) and the National Longitudinal Study of Adolescent Health (details at <a href="http://www.cpc.unc.edu/projects/addhealth">http://www.cpc.unc.edu/projects/addhealth</a>) and have a Cronbach’s alpha of 0.800.</p> |
| <p><u>Protective Factors</u></p> |                                                                                                                                                                                                                                                                                                                                                   |                                                                                                                                                                                                                   |                                                                                                                                                                                                                                                                                                                                                                                                                                                                                                                                                                                                                                                                                                                                                                                                                                                                                                                                                                                                                                                                                                                                                                                                                                                                                                               |
| <p>School connectedness</p>      | <p>For these items, please choose the one answer that best describes what is happening in your school:</p> <ul style="list-style-type: none"> <li>a. You feel close to people at your school.</li> <li>b. You feel like you are part of your school.</li> <li>c. You are happy to be at your school.</li> </ul>                                   | <p>1=Strongly disagree<br/> 2=Disagree<br/> 3=Neither agree nor disagree<br/> 4=Agree<br/> 5=Strongly agree</p>                                                                                                   | <p><u>Any exposure</u> - if the respondent had an average score of 4 or higher across the three survey items.</p> <p><u>Level of scores</u>- Youth were categorized into “low,” “moderate,” and “high” score levels based on their average scores across all answered survey items in a manner similar to how “friendships with delinquents” was coded. Most (95.3%) of the respondents answered at least 2 items; 3.6% answered 1 item; 1.1% answered 0 items and were listed as having “unknown” values. Youth were in the “low” level if they had an average score of <math>\leq 3.2</math> (i.e., threshold at the 33%ile), a “high” level if they had an average score <math>&gt; 3.7</math> (i.e., threshold at the 66%ile), and a “moderate” level if they had a score in between.</p> <p><u>Variable characteristics</u>-The three survey items included for this factor were originally adapted from the National Longitudinal Study of Adolescent</p>                                                                                                                                                                                                                                                                                                                                               |

|                      |                                                                                                                                                                                                                                                                                                                                                                                                                                                                                                                                                                                                                                           |                                                                                      |                                                                                                                                                                                                                                                                                                                                                                                                                                                                                                                                                                                                                                                                                                                                                                                                                                                                                                                                                                                                                                                                                                                                                                               |
|----------------------|-------------------------------------------------------------------------------------------------------------------------------------------------------------------------------------------------------------------------------------------------------------------------------------------------------------------------------------------------------------------------------------------------------------------------------------------------------------------------------------------------------------------------------------------------------------------------------------------------------------------------------------------|--------------------------------------------------------------------------------------|-------------------------------------------------------------------------------------------------------------------------------------------------------------------------------------------------------------------------------------------------------------------------------------------------------------------------------------------------------------------------------------------------------------------------------------------------------------------------------------------------------------------------------------------------------------------------------------------------------------------------------------------------------------------------------------------------------------------------------------------------------------------------------------------------------------------------------------------------------------------------------------------------------------------------------------------------------------------------------------------------------------------------------------------------------------------------------------------------------------------------------------------------------------------------------|
|                      |                                                                                                                                                                                                                                                                                                                                                                                                                                                                                                                                                                                                                                           |                                                                                      | Health (at <a href="http://www.cpc.unc.edu/projects/addhealth">http://www.cpc.unc.edu/projects/addhealth</a> ) and have a Cronbach's alpha of 0.714.                                                                                                                                                                                                                                                                                                                                                                                                                                                                                                                                                                                                                                                                                                                                                                                                                                                                                                                                                                                                                          |
| Parental care        | <p>In the past 30 days, when you did something that your parents/guardians liked or approved of, how often did one of them.....</p> <ol style="list-style-type: none"> <li>Say something nice about it, praise or approval?</li> <li>Give you a hug, pat on the back, or kiss for it?</li> <li>Give you some reward for it, like a present, extra allowance or something special to eat?</li> <li>Give you a special privilege such as staying up late, watching TV, or doing some special activity?</li> <li>Do something special together with you, such as going to the movies, playing a game, or going somewhere special?</li> </ol> | <p>1=Almost never<br/>2=sometimes<br/>3=Almost always</p>                            | <p><u>Any exposure</u>- if the respondent had an average score of "sometimes" or more often across the five survey items.</p> <p><u>Level of scores</u>- Youth were also categorized into "low," "moderate," and "high" score levels based on their average scores across all answered survey items in a manner similar to how "friendships with delinquents" was coded. Most (96.0%) of the respondents answered at least 4 items; 3.0% answered 1-4 items; 1.0% answered 0 items and were listed as having "unknown" values. Youth were in the "low" level if they had an average score of <math>\leq 1.77</math> (i.e., threshold at the 33%ile), a "high" level if they had an average score <math>&gt; 2.22</math> (i.e., threshold at the 66%ile), and a "moderate" level if they had a score in between.</p> <p><u>Variable characteristics</u>-The five survey items included for this factor were originally adapted from the Pittsburgh Youth Study (Loeber, Farrington, Stouthamer-Loeber, &amp; VanHammen, 1989) and the Multisite Project (Miller-Johnson, Sullivan, Simon, &amp; Multisite Violence Prevention, 2004) and have a Cronbach's alpha of 0.785.</p> |
| Parental supervision | <p>In the past 30 days, how often did you have a set time to be home on school nights?</p> <p>In the past 30 days, how often did you have a set time to be home on weekend nights?</p> <p>In the past 30 days, was it important for your parent/guardian to know what you were doing when you were outside of the house?</p> <hr/> <p>In the past 30 days,</p>                                                                                                                                                                                                                                                                            | <p>1=No set time<br/>2=Sometimes<br/>3=Almost always</p> <hr/> <p>1=Almost never</p> | <p><u>Any exposure</u>- if the respondent had an average score of "sometimes" or more often across the seven survey items.</p> <p><u>Level of scores</u>- Youth were categorized into "low," "moderate," and "high" score levels based on their average scores across all answered survey items in a manner similar to how "friendships with delinquents" was coded. Most (95.7%) of the respondents answered at least 6 items; 4.0% answered 1-5 items; 0.3% answered 0 items and were listed as having "unknown" values. Because the scales were similar and the questions covered similar time frames (&lt;30 days), both scales were combined into one variable. Youth were in the "low" level if they had an average score of <math>\leq 2.1</math> (i.e., threshold at the 33%ile), a "high" level if they had an average score <math>&gt; 2.55</math> (i.e., threshold at the 66%ile), and a "moderate" level if they had a score in between.</p>                                                                                                                                                                                                                      |

|  |                                                                                                                                                                                                                                                                                                                                                                                                                                                                                          |                                        |                                                                                                                                                                                                                                                                                                                   |
|--|------------------------------------------------------------------------------------------------------------------------------------------------------------------------------------------------------------------------------------------------------------------------------------------------------------------------------------------------------------------------------------------------------------------------------------------------------------------------------------------|----------------------------------------|-------------------------------------------------------------------------------------------------------------------------------------------------------------------------------------------------------------------------------------------------------------------------------------------------------------------|
|  | <ul style="list-style-type: none"> <li>a. If your parents/guardians were not at home, how often did you leave a note or call to let them know where you were going?</li> <li>b. How often did your parents/guardians know who you were with when you were not at home?</li> <li>c. When you were out, did your parents/guardians know what time you would be home?</li> <li>d. When you and a parent/guardian were at home, how often did he or she know what you were doing?</li> </ul> | <p>2=Sometimes<br/>3=Almost always</p> | <p><u>Variable characteristics</u>-The seven survey items included for this factor were originally adapted from the Pittsburgh Youth Study (Loeber et al., 1989) and the Multisite Project (Miller-Johnson, Sullivan, Simon, &amp; Multisite Violence Prevention, 2004) and have a Cronbach's alpha of 0.755.</p> |
|--|------------------------------------------------------------------------------------------------------------------------------------------------------------------------------------------------------------------------------------------------------------------------------------------------------------------------------------------------------------------------------------------------------------------------------------------------------------------------------------------|----------------------------------------|-------------------------------------------------------------------------------------------------------------------------------------------------------------------------------------------------------------------------------------------------------------------------------------------------------------------|

References

Conduct Problems Prevention Research Group. (1998). *The Fast Track Project – “Things that my friends have done”* (Unpublished technical report).

Foshee, V. A., Linder, G. F., Bauman, K. E., Langwick, S. A., Arriaga, X. B., Heath, J. L., ... Bangdiwala S. (1996). The Safe Dates Project: Theoretical basis, evaluation design, and selected baseline findings. *American Journal of Preventive Medicine, 12*(5 Suppl), 39–47.

Loeber, R., Farrington, D., Stouthamer-Loeber, M., & VanHammen, W. (1989). *Antisocial behavior and mental health problems: Explanatory factors in childhood and adolescence* (Unpublished NIMH grand proposal).

Miller-Johnson, S., Sullivan, T. N., Simon, T. R., & Multisite Violence Prevention Project. (2004). Evaluating the impact of interventions in the Multisite Violence Prevention Study: samples, procedures, and measures. *American Journal of Preventive Medicine, 26*(1 Suppl), 48–61.

Orpinas, P. (1993). *Modified Depression Scale*. Houston, TX: University of Texas Health Science Center at Houston.
