# Supplementary figures and images for: Characteristics of Youth With Combined Histories of Violent Behavior, Suicidal Ideation or Behavior, and Gun-Carrying
Source: Atypon-hosted journal article supplement (doi:10.1027/0227-5910/a000389), 2016-06-01

ESM 1. Diagram Illustrating Respondent Inclusion/Exclusion Criteria

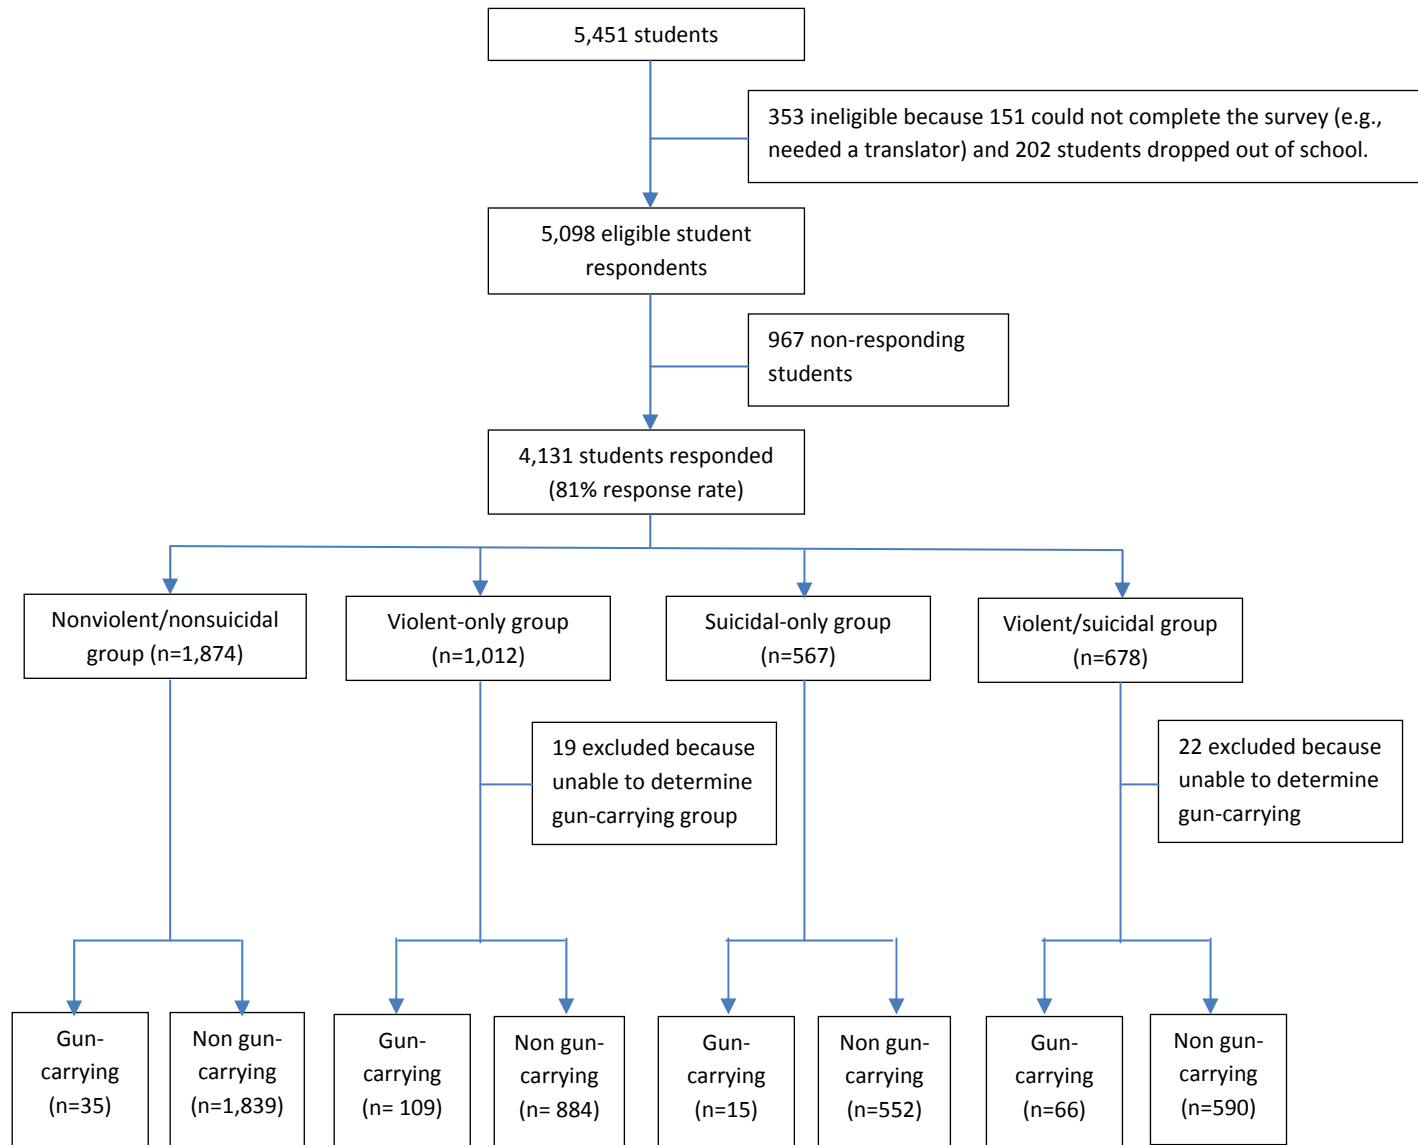

Supplement: 0227-5910_a000389_esm1.pdf [file 0227-5910_a000389_esm1.pdf]
